# Supplementary material for: Delayed Fluorescence from Inverted Singlet and Triplet Excited States for Efficient Organic Light-Emitting Diodes
Source: Research Square preprint supplement (doi:10.21203/rs.3.rs-478258/v1), 2021-05-13
Supplement: Supplementary file 1 [file 3e1148869341f100fa7cdd3e.pdf]

## Supplementary Information

### Delayed Fluorescence from Inverted Singlet and Triplet Excited States for Efficient Organic Light-Emitting Diodes

Naoya Aizawa<sup>1,2\*</sup>, Yong-Jin Pu<sup>1,3\*</sup>, Atsuko Nihonyanagi<sup>1</sup>, Ryotaro Ibuka<sup>1</sup>, Hiroyuki Inuzuka<sup>1</sup>, Barun Dhara<sup>1</sup>, Yuki Koyama<sup>1,3</sup>, Fumito Araoka<sup>1</sup> and Daigo Miyajima<sup>1\*</sup>

<sup>1</sup> RIKEN Center for Emergent Matter Science (CEMS), 2-1 Hirosawa, Wako, Saitama, 351-0198, Japan.

<sup>2</sup> Precursory Research for Embryonic Science and Technology (PRESTO), Japan Science and Technology Agency (JST), 4-1-8 Honcho, Kawaguchi, Saitama 332-0012, Japan.

<sup>3</sup> Graduate School of Organic Materials Science, Yamagata University, Yonezawa, Yamagata 992-8510, Japan.

Corresponding Authors: E-mail: naoya.aizawa@riken.jp; yongjin.pu@riken.jp; daigo.miyajima@riken.jp

#### Table of contents

##### 1. Supplementary synthesis and characterisation

##### 2. Supplementary materials and methods

Supplementary Fig. 1 Electronic configurations for two electrons in three orbitals.

Supplementary Fig. 2 Structures of 186 substituents used for generating the candidate heptazine analogues.

Supplementary Table 1 Singlet–triplet energy gap ( $\Delta E_{ST}$ ) and oscillator strength ( $f$ ) of HzTFEX<sub>2</sub> and HzPipX<sub>2</sub> calculated by various methods.

Supplementary Fig. 3 Photophysical properties of HzTFEP<sub>2</sub> and HzPipT<sub>2</sub>.

Supplementary Fig. 4 OLED performance.

Supplementary Table 2 Summary of OLED performance.

## 1. Supplementary synthesis and characterisation

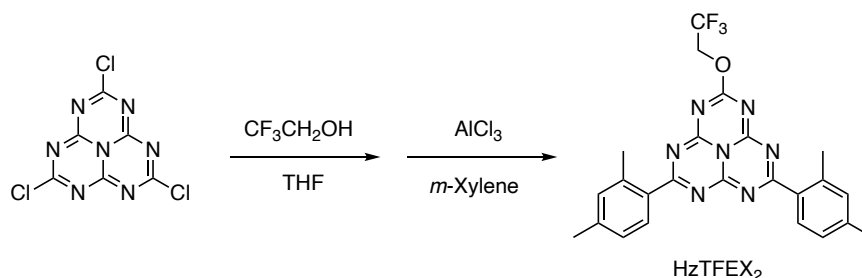

**Synthesis of HzTFEX<sub>2</sub>** 60% NaH oil dispersion (121 mg, 3.0 mmol) was added to a solution of 2,2,2-trifluoroethanol (199  $\mu$ L, 2.78 mmol) in THF (10 mL) at 0 °C. After stirring for 30 min, the solution was added dropwise to a solution of 2,5,8-trichloroheptazine (700 mg, 2.53 mmol) in THF (20 mL) at 0 °C. After stirring for 2 h, the mixture was concentrated under reduced pressure to give a yellow solid. The crude products were used in the next step without further purification. The crude products were dissolved in *m*-xylene (12 mL), and AlCl<sub>3</sub> (1.0 g, 7.5 mmol) was added to the mixture at 0 °C. The reaction mixture was stirred for 2 h at 0 °C and then for 17 h at room temperature and quenched with H<sub>2</sub>O. After the addition of CHCl<sub>3</sub> and stirring for 30 min, the organic phase was separated, dried over Na<sub>2</sub>SO<sub>4</sub>, and evaporated. The residue was purified by column chromatography on silica gel (CHCl<sub>3</sub>) to give 116 mg (0.242 mmol, 9.6%) of yellow solid.

<sup>1</sup>H NMR (600 MHz, CDCl<sub>3</sub>)  $\delta$  [ppm] = 2.39 (s, 6H), 2.73 (d,  $J$  = 4.8 Hz, 6H), 4.88 (q,  $J$  = 8.2 Hz, 2H), 7.11–7.13 (m, 4H), 8.19 (d,  $J$  = 7.8 Hz, 2H). <sup>13</sup>C NMR (150 MHz, CDCl<sub>3</sub>)  $\delta$  [ppm] = 21.61, 23.15, 64.47, 126.91, 130.88, 132.49, 133.29, 141.57, 144.46, 157.28, 158.84, 170.12, 178.40. <sup>19</sup>F NMR (600 MHz, CDCl<sub>3</sub>)  $\delta$  [ppm] = –73.67 (s). MS (FD-TOF): 479.16915 [M]<sup>+</sup>, calcd. for C<sub>24</sub>H<sub>20</sub>F<sub>3</sub>N<sub>7</sub>O (479.16814), error = 2.1 ppm.

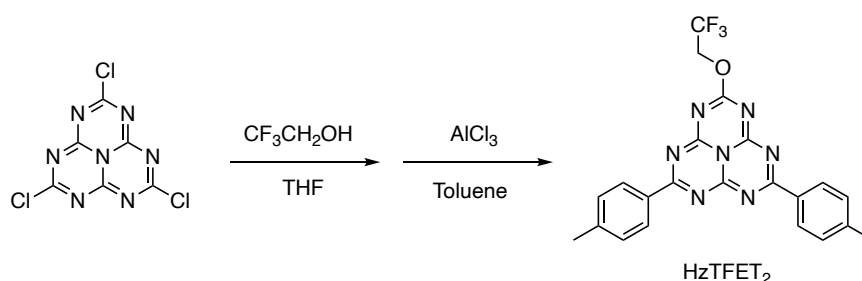

**Synthesis of HzTFET<sub>2</sub>** The synthetic procedure was the same as that of HzTFEX<sub>2</sub> except that toluene was used in place of *m*-xylene. <sup>1</sup>H NMR (600 MHz, CDCl<sub>3</sub>)  $\delta$  [ppm] = 2.46 (s, 6H), 4.90 (q,  $J$  = 8 Hz, 2H), 7.33 (d,  $J$  = 7.8 Hz, 4H), 8.45 (d,  $J$  = 8.4 Hz, 4H). <sup>13</sup>C NMR (150 MHz, CDCl<sub>3</sub>)  $\delta$  [ppm] = 25.51, 67.89, 133.17, 134.11, 134.43, 150.23, 161.31, 162.48, 173.28, 178.90. <sup>19</sup>F NMR (600 MHz, CDCl<sub>3</sub>)  $\delta$  [ppm] = –74.12 (s). MS (FD-TOF): 451.13667 [M]<sup>+</sup>, calcd. for C<sub>22</sub>H<sub>16</sub>F<sub>3</sub>N<sub>7</sub>O (451.13684), error = 0.37 ppm.

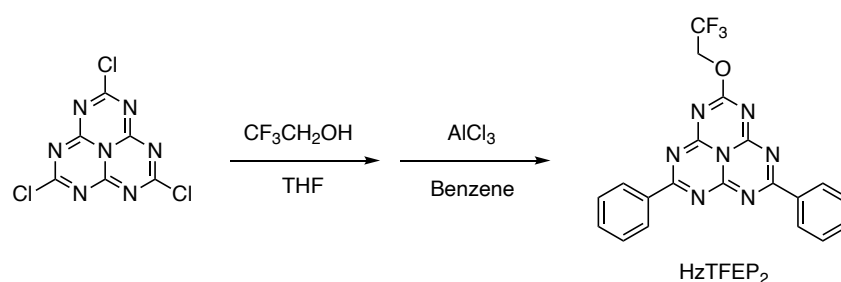

**Synthesis of HzTFEP<sub>2</sub>** The synthetic procedure was the same as that of HzTFEX<sub>2</sub> except that benzene was used in place of *m*-xylene. <sup>1</sup>H NMR (600 MHz, CDCl<sub>3</sub>)  $\delta$  [ppm] = 4.92 (q, *J* = 8 Hz, 2H), 7.53 (dd, *J* = 7.8 Hz, 4H), 7.68 (dd, *J* = 7.2 Hz, 2H), 8.56 (d, *J* = 7.2 Hz, 4H). <sup>13</sup>C NMR (150 MHz, CDCl<sub>3</sub>)  $\delta$  [ppm] = 64.60, 128.78, 130.70, 133.65, 135.07, 158.33, 159.45, 170.22, 176.03. <sup>19</sup>F NMR (600 MHz, CDCl<sub>3</sub>)  $\delta$  [ppm] = -73.69 (s). MS (FD-TOF): 423.10465 [M]<sup>+</sup>, calcd. for C<sub>20</sub>H<sub>12</sub>F<sub>3</sub>N<sub>7</sub>O (423.10554), error = 2.1 ppm.

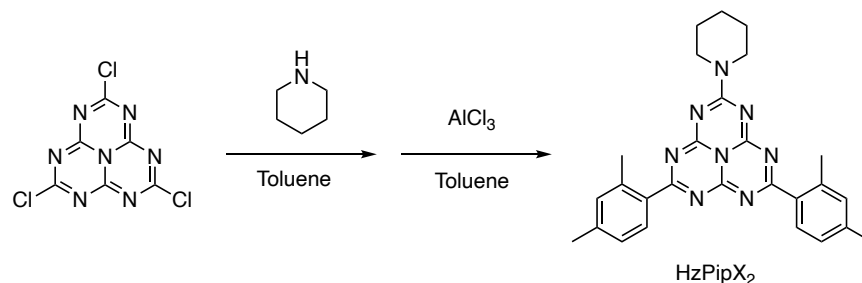

**Synthesis of HzPipX<sub>2</sub>** To a solution of 2,5,8-trichloroheptazine (100 mg, 0.362 mmol) in toluene (3 mL) was added piperidine (36  $\mu$ L, 0.36 mmol) at room temperature. After 30 min of stirring at 100 °C, the mixture was allowed to cool to room temperature, and AlCl<sub>3</sub> (106 mg, 0.795 mmol) was added. The reaction mixture was stirred for 1 h at 100 °C and diluted with H<sub>2</sub>O and CHCl<sub>3</sub> at room temperature. The organic phase was separated, dried over Na<sub>2</sub>SO<sub>4</sub>, and evaporated. The residue was purified by column chromatography on silica gel (AcOEt/CHCl<sub>3</sub> = 0:100 to 1:20) to give 19 mg (0.044 mmol, 12%) of yellow solid.

<sup>1</sup>H NMR (600 MHz, CDCl<sub>3</sub>)  $\delta$  [ppm] = 1.68–1.72 (m, 6H), 2.36 (s, 6H), 2.67 (s, 6H), 3.96 (br s, 4H), 7.05–7.07 (br, 4H), 7.99 (d, *J* = 8.4 Hz, 2H). <sup>13</sup>C NMR (150 MHz, CDCl<sub>3</sub>)  $\delta$  [ppm] = 21.81, 24.32, 26.19, 45.94, 129.16, 130.26, 132.01, 144.76, 156.53, 157.74, 161.11, 174.40. MS (FD-TOF): 464.24440 [M]<sup>+</sup>, calcd. for C<sub>25</sub>H<sub>24</sub>N<sub>8</sub> (464.24369), error = 1.53 ppm.

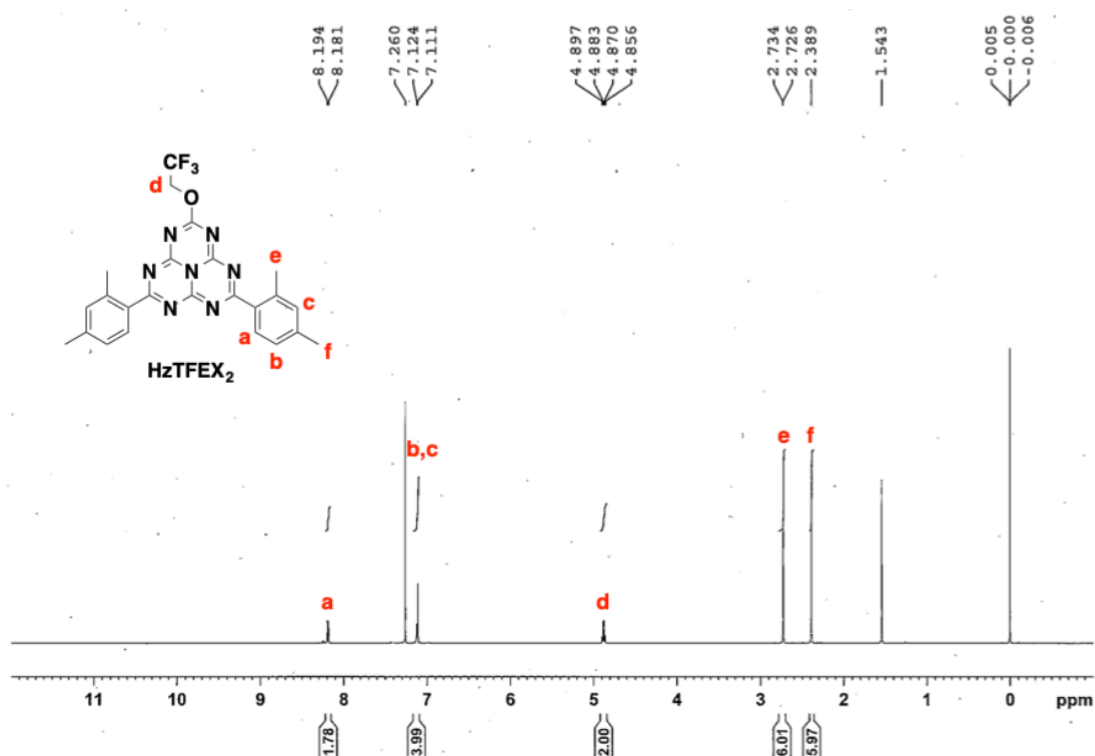

<sup>1</sup>H NMR of **HzTFEX<sub>2</sub>** in CDCl<sub>3</sub> at 25 °C

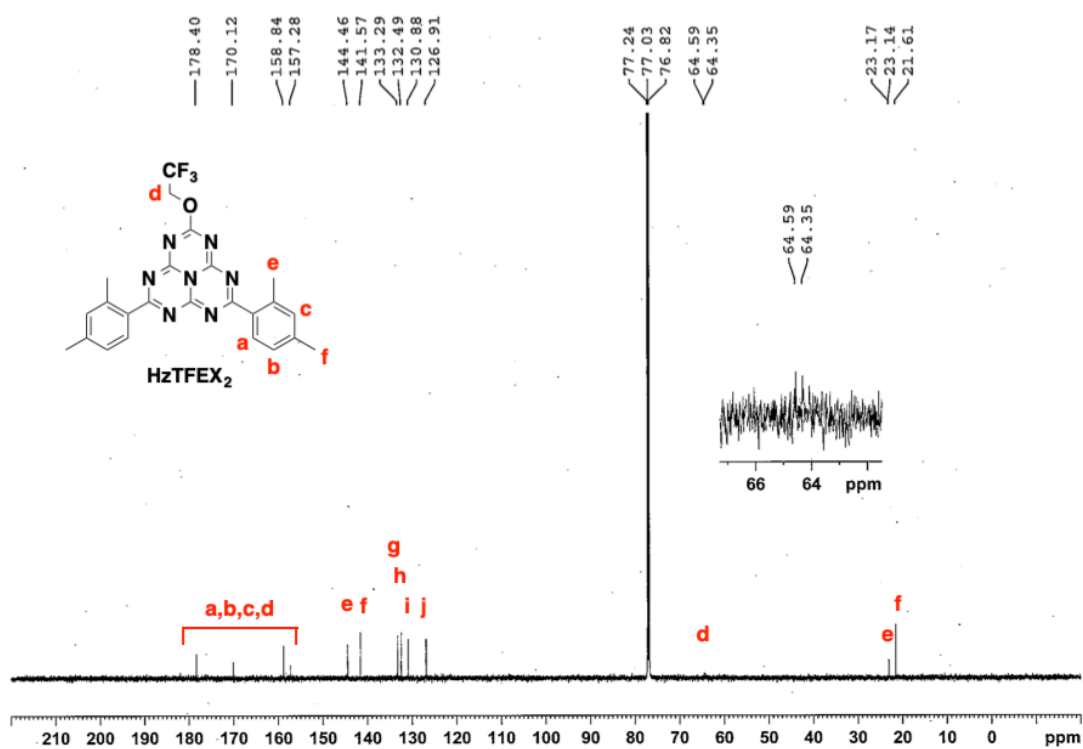

<sup>13</sup>C NMR of **HzTFEX<sub>2</sub>** in CDCl<sub>3</sub> at 25 °C

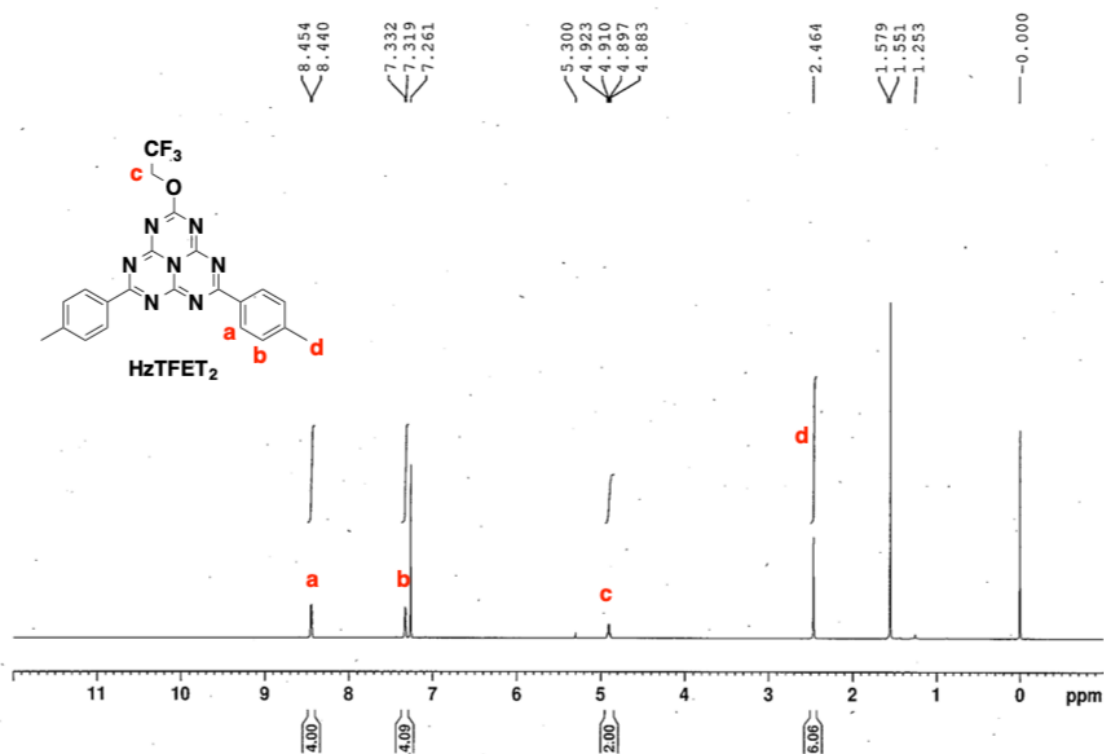

<sup>1</sup>H NMR of **HzTFET<sub>2</sub>** in CDCl<sub>3</sub> at 25 °C

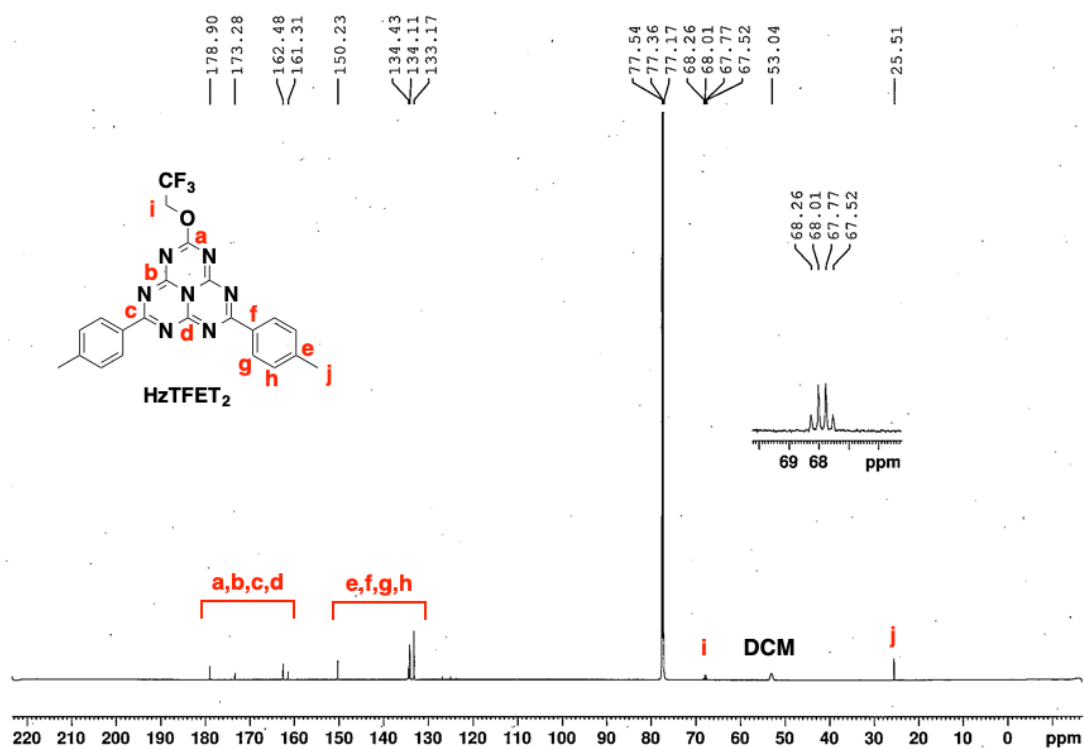

<sup>13</sup>C NMR of **HzTFET<sub>2</sub>** in CDCl<sub>3</sub> at 25 °C

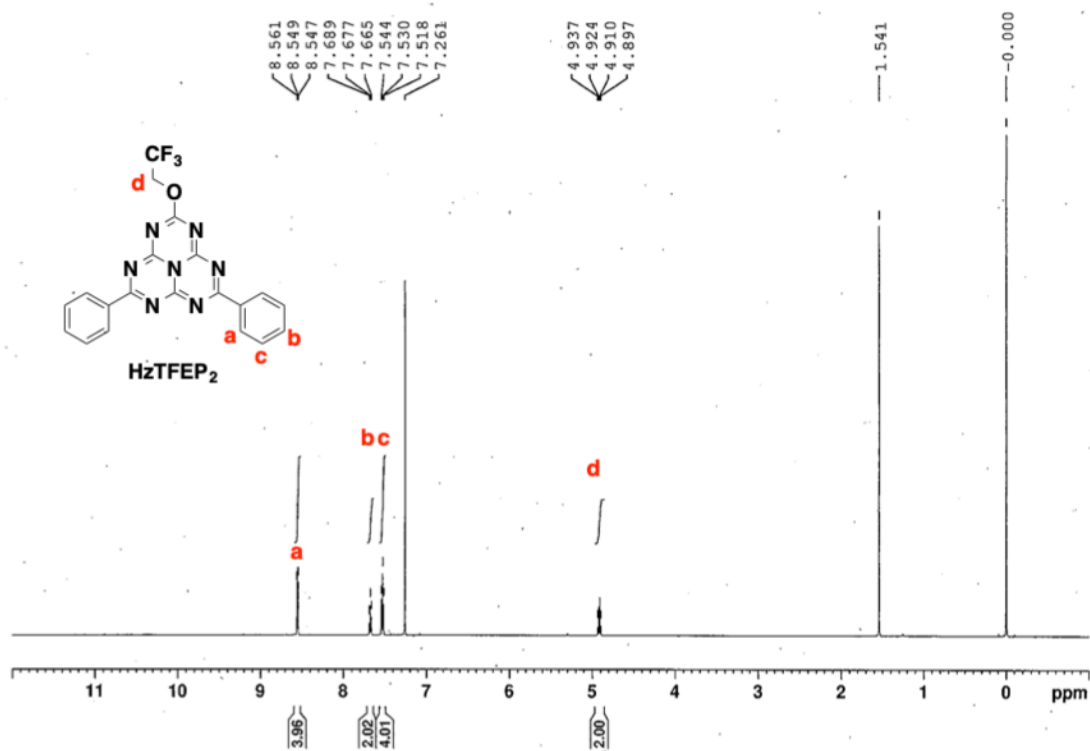

<sup>1</sup>H NMR of **HzTFEP<sub>2</sub>** in CDCl<sub>3</sub> at 25 °C

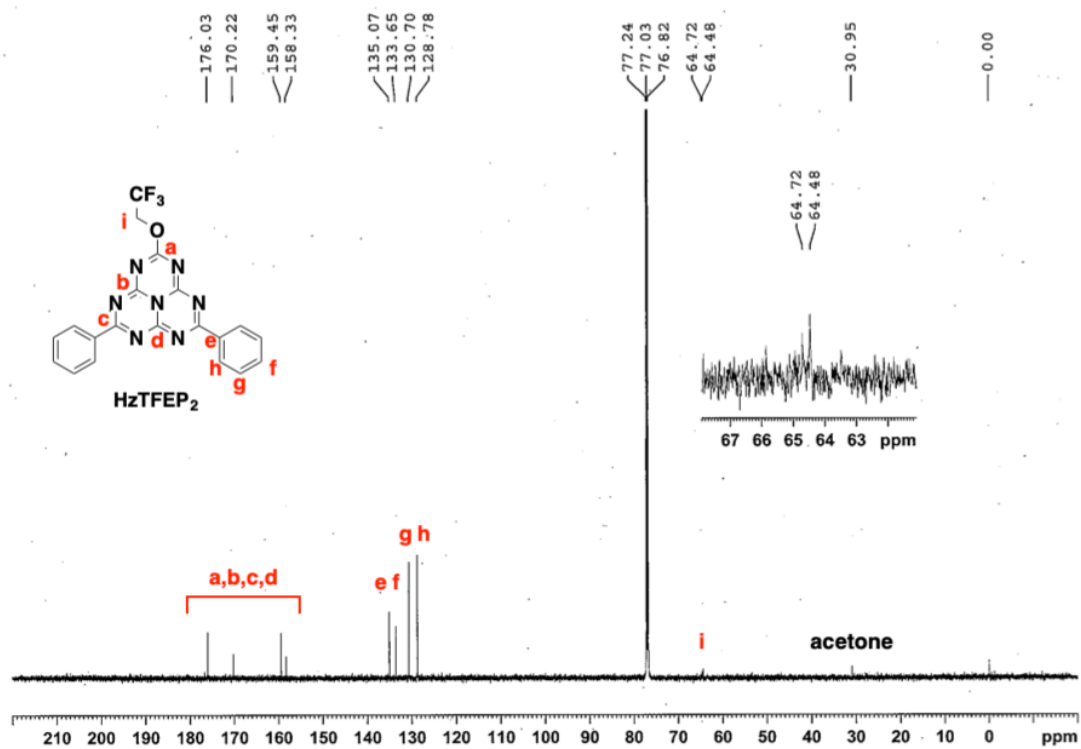

<sup>13</sup>C NMR of **HzTFEP<sub>2</sub>** in CDCl<sub>3</sub> at 25 °C

## 2. Supplementary materials and methods

**Materials** Commercially available reagents and solvents were used without further purification unless otherwise noted. Poly(3,4-ethylenedioxythiophene):poly(styrene sulfonate) (PEDOT:PSS) aqueous dispersions were purchased from Heraeus. 2,4,5,6-Tetra(carbazol-9-yl)isophthalonitrile (4CzIPN), 4,4''-bis(triphenylsilyl)-1,1':4',1''-terphenyl (BST), bis(4-(dibenzo[*b,d*]furan-4-yl)phenyl)diphenylsilane (DBFSiDBF), bis(diphenylphosphoryl)dibenzo[*b,d*]furan (PPF), and 1,3-bis(3,5-di(pyridine-3-yl)phenyl)benzene (B3PyPB) were purchased from Luminescence Technology Corporation. 1,1-Bis(4-di-*p*-tolylaminophenyl)cyclohexane (TAPC), 4,4'-bis(carbazol-9-yl)biphenyl (CBP), tris(8-hydroxyquinolinato)aluminium (Alq3), 8-hydroxyquinolinatolithium (Liq), and 2-methyl-9,10-bis(naphthalene-2-yl)anthracene (MADN) were purchased from e-Ray Optoelectronics Technology. Molybdenum oxide (MoO<sub>3</sub>), lithium fluoride (LiF), and aluminium (Al) were purchased from FURUUCHI Chemical.

**General method** NMR spectra were recorded on a Bruker Avance III HD spectrometer. The chemical shifts ( $\delta$  in ppm) were determined using tetramethylsilane as an internal reference. Matrix-assisted laser desorption ionization time-of-flight (MALDI-TOF) mass spectrometry was performed on a Bruker model Autoflex<sup>TM</sup> speed spectrometer in reflector mode using dithranol as a matrix. High-resolution mass data were obtained by using a JEOL JMS-T100GCV with field desorption (FD) as an ionization method.

**OLED fabrication** OLEDs were fabricated on glass substrates covered with indium tin oxide (ITO) (sheet resistance =  $15 \, \Omega \, \text{sq}^{-1}$ ). The substrates were sequentially cleaned by sonication in detergent, deionized water, acetone, and 2-propanol, followed by UV–ozone treatment for 30 min. PEDOT:PSS was spin-coated on the substrates and annealed at 200 °C on a hot plate for 10 min in ambient conditions. The other materials were sequentially deposited on the substrates under vacuum ( $< 5 \times 10^{-5} \, \text{Pa}$ ) at a deposition rate of  $< 0.3 \, \text{nm s}^{-1}$  through shadow masks defining a pixel size of  $4.0 \, \text{mm}^2$ . The deposition rate and layer thicknesses of each layer were monitored using a quartz crystal microbalance. The devices were prepared for evaluation by encapsulation using epoxy glue and glass lids under a nitrogen atmosphere. The fabricated OLEDs consist of the following layer sequences:

Device I. Glass/ITO (130 nm)/PEDOT:PSS (30 nm)/MoO<sub>3</sub> (5 nm)/BST (3 nm)/DBFSiDBF (10 nm)/PPF:10 wt% HzTFEX<sub>2</sub> (15 nm)/PPF (10 nm)/Alq<sub>3</sub> (40 nm)/Li<sub>q</sub> (1 nm)/Al (80 nm)

Device II. Glass/ITO (130 nm)/PEDOT:PSS (30 nm)/TAPC (40 nm)/CBP:5 wt% 4CzIPN (20 nm)/B3PyPB (40 nm)/LiF (1 nm)/Al (80 nm)

Device III. Glass/ITO (130 nm)/PEDOT:PSS (30 nm)/TAPC (40 nm)/MADN (20 nm)/B3PyPB (40 nm)/LiF (1 nm)/Al (80 nm)

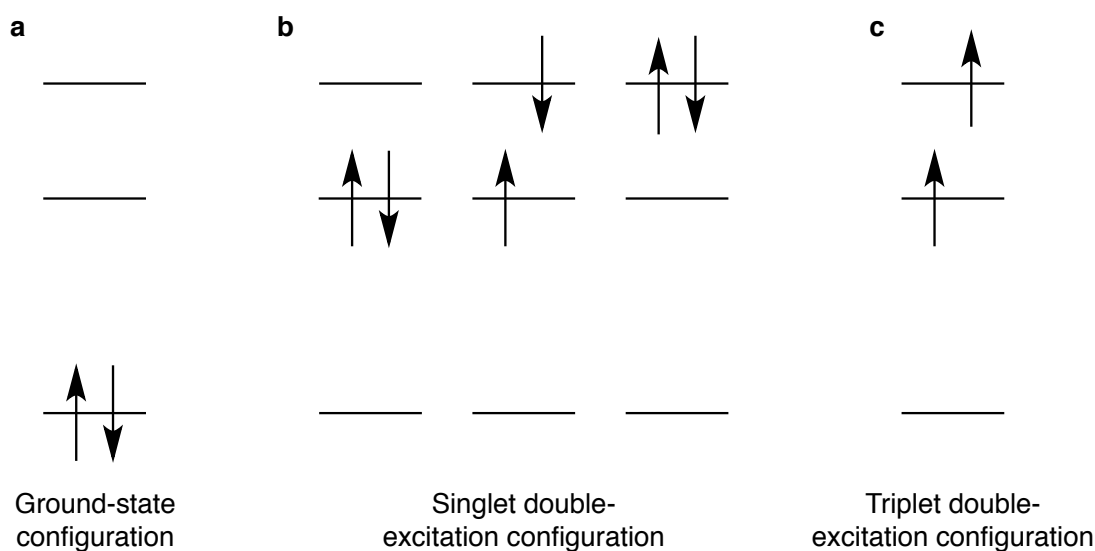

**Supplementary Fig. 1 | Electronic configurations for two electrons in three orbitals.** **a**, Ground-state configuration. **b**, Singlet double-excitation configurations. **c**, Triplet double-excitation configuration. The Pauli exclusion principle precludes the two electrons from occupying a given orbital in (c).





**Supplementary Table 1** Singlet–triplet energy gap ( $\Delta E_{\text{ST}}$ ) and oscillator strength ( $f$ ) of HzTFEX<sub>2</sub> and HzPipX<sub>2</sub> calculated by various methods.

| Molecule            | Method                | $\Delta E_{\text{ST}}$<br>(meV) | $f$   |
|---------------------|-----------------------|---------------------------------|-------|
| HzTFEX <sub>2</sub> | TDDFT <sup>a</sup>    | 210                             | 0.010 |
|                     | EOM-CCSD <sup>b</sup> | −12                             | 0.019 |
|                     | ADC(2) <sup>c</sup>   | −34                             | 0.018 |
|                     | CASPT2 <sup>d</sup>   | −184                            | —     |
| HzPipX <sub>2</sub> | TDDFT <sup>a</sup>    | 334                             | 0.015 |
|                     | EOM-CCSD <sup>b</sup> | 10                              | 0.040 |
|                     | ADC(2) <sup>c</sup>   | −12                             | 0.040 |
|                     | CASPT2 <sup>d</sup>   | −171                            | —     |

<sup>a</sup>TDDFT LC-BLYP/6-31G(d) at the lowest-energy triplet excited state (T<sub>1</sub>) geometry optimised by LC-BLYP/6-31G with a range-separated parameter of 0.18  $\text{a.u.}^{-1}$ . <sup>b</sup>EOM-CCSD/cc-pVDZ at the T<sub>1</sub> geometry optimised by MP2/cc-pVDZ. <sup>c</sup>ADC(2)/cc-pVDZ at the T<sub>1</sub> geometry optimised by MP2/cc-pVDZ. <sup>d</sup>CASPT2(12,12)/cc-pVDZ at the T<sub>1</sub> geometry optimised by MP2/cc-pVDZ.

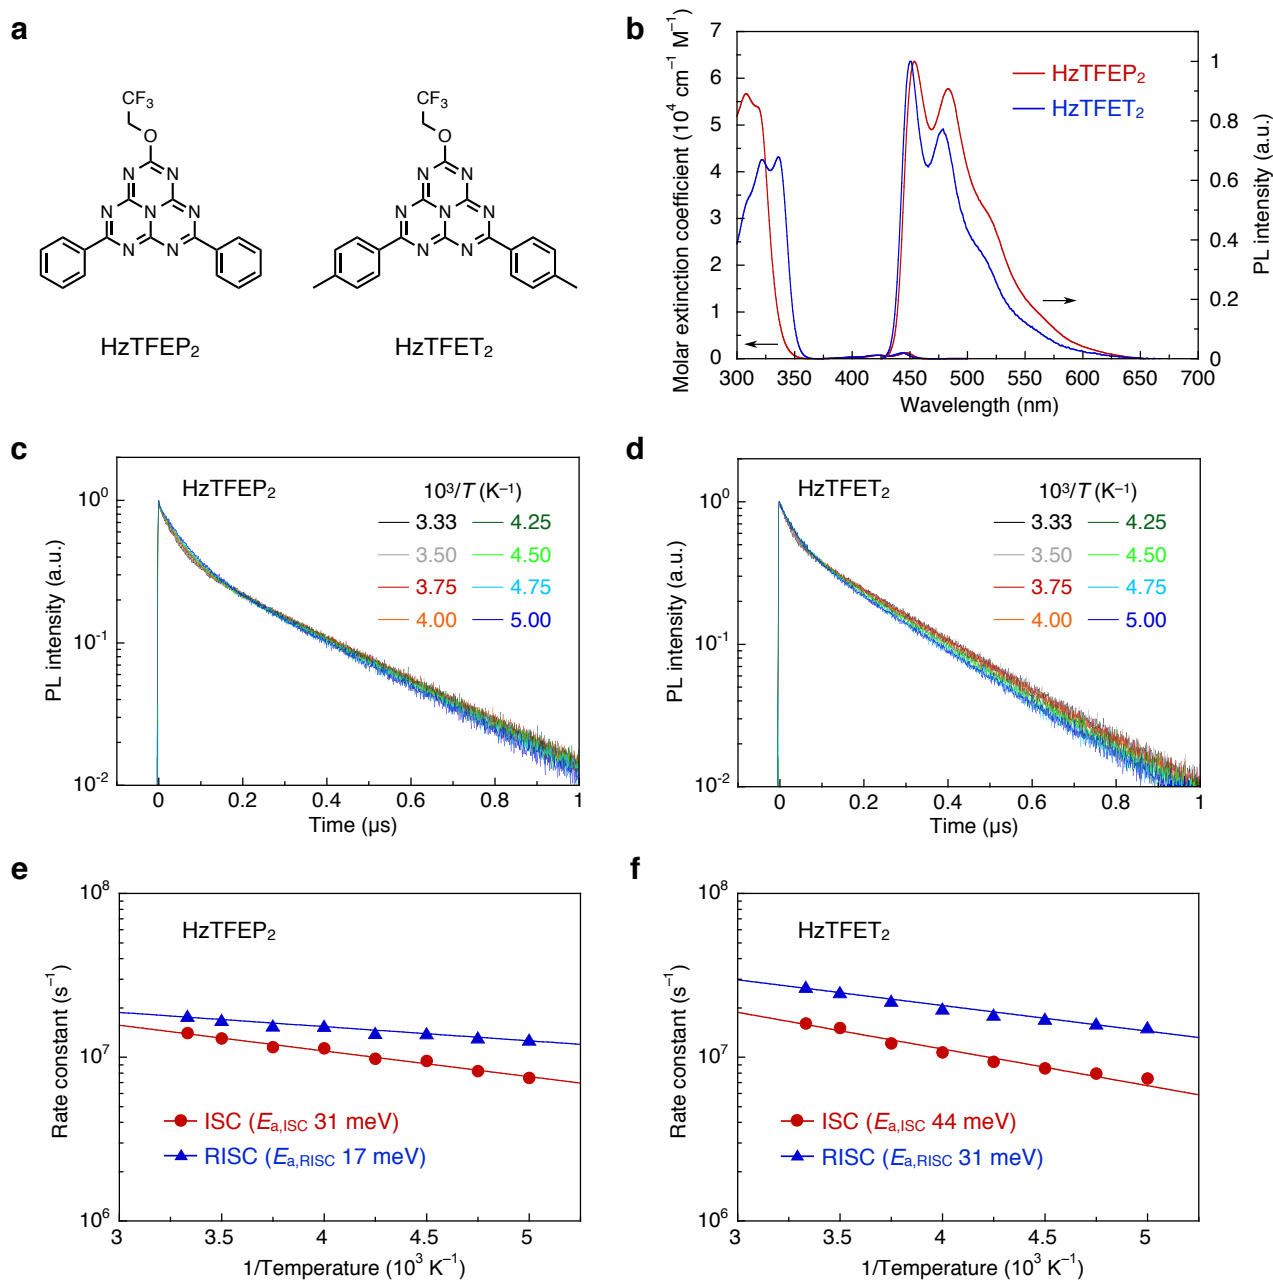

**Supplementary Fig. 3 | Photophysical properties of HzTFEP<sub>2</sub> and HzPipT<sub>2</sub>.** **a**, Molecular structures of HzTFEP<sub>2</sub> and HzTFET<sub>2</sub>. **b**, Steady-state absorption and photoluminescence (PL) spectra of HzTFEP<sub>2</sub> and HzTFET<sub>2</sub> in deaerated toluene. **c**, **d**, Transient PL decays of HzTFEP<sub>2</sub> (**c**) and HzTFET<sub>2</sub> (**d**) at varying temperatures in deaerated toluene. **e**, **f**, Temperature dependence of the rate constants of ISC and RISC ( $k_{\text{ISC}}$  and  $k_{\text{RISC}}$ ) of HzTFEP<sub>2</sub> (**e**) and HzTFET<sub>2</sub> (**f**). The solid lines in (**e**) and (**f**) represent the fits of the plots to the Arrhenius equation.

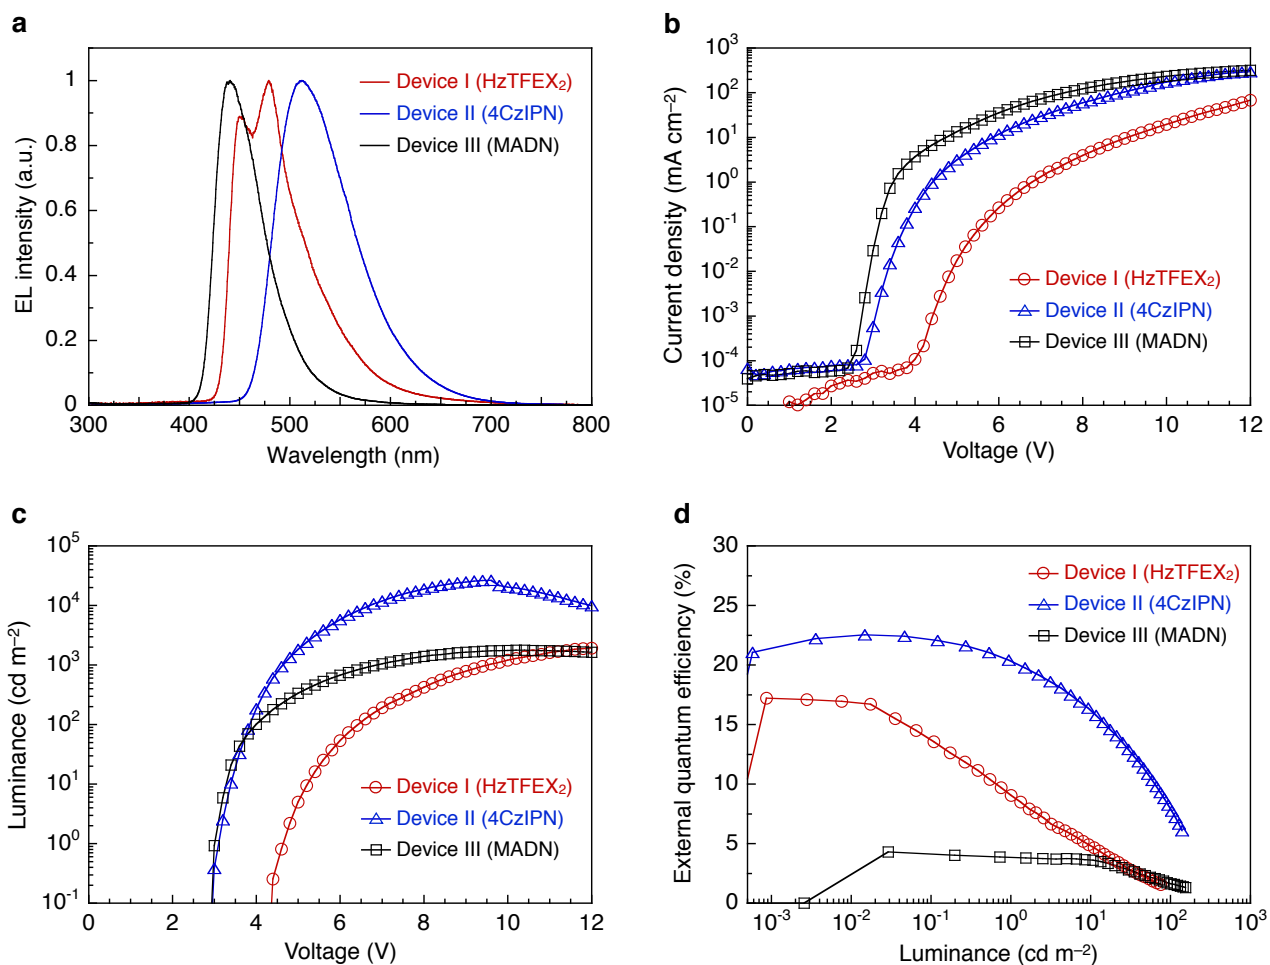

**Supplementary Fig. 4 | OLED performance.** a, b, c, d, Electroluminescence (EL) spectra measured at 1.0 mA (a), current density–voltage characteristics (b), luminance–voltage characteristics (c), and external quantum efficiency–current density characteristics (d) of Devices I, II, and III.

**Supplementary Table 2** Summary of OLED performance.

| Device | Emitter             | $\lambda_{\text{EL}}$<br>(nm) <sup>a</sup> | CIE<br>(x, y) <sup>b</sup> | $V_{\text{on}}$<br>(V) <sup>c</sup> | $\eta_{\text{ext,max}}$<br>(%) <sup>d</sup> | $\eta_{\text{ext,1/100/1000}}$<br>(%) <sup>e</sup> |
|--------|---------------------|--------------------------------------------|----------------------------|-------------------------------------|---------------------------------------------|----------------------------------------------------|
| I      | HzTFEX <sub>2</sub> | 450, 479                                   | 0.17, 0.24                 | 4.8                                 | 17.2                                        | 17.1/10.3/4.2                                      |
| II     | 4CzIPN              | 512                                        | 0.28, 0.56                 | 3.2                                 | 22.5                                        | 21.4/22.0/19.7                                     |
| III    | MADN                | 441                                        | 0.15, 0.08                 | 3.2                                 | 4.3                                         | 4.3/3.7/2.0                                        |

<sup>a</sup>Peak wavelength of EL spectra measured at 1.0 mA. <sup>b</sup>Commission Internationale de l'éclairage (CIE) coordinates measured at 1.0 mA. <sup>c</sup>Turn-on voltage for luminance > 1 cd m<sup>-2</sup>. <sup>d</sup>Maximum external quantum efficiency. <sup>e</sup>External quantum efficiencies at luminances of 1, 100, and 1000 cd m<sup>-2</sup>.
